# Supplementary material for: New cyanopyridone based luminescent liquid crystalline materials: synthesis and characterization
Source: Royal Society of Chemistry journal article supplement (doi:10.1039/c4pp00031e), 2014-07-21
Supplement: c4pp00031e1.pdf [file c4pp00031e1.pdf]

## Supporting Information

### New cyanopyridone based luminescent liquid crystalline materials: Synthesis and characterization

Ahipa T.N., and Airody Vasudeva Adhikari \*

Department of Chemistry, National Institute of Technology Karnataka, Surathkal, Mangalore -  
575025, India.

\* Corresponding author. Tel.: +91 8242474046; fax: +918242474033.

E-mail addresses: [avachem@gmail.com](mailto:avachem@gmail.com), [avadhikari123@yahoo.co.in](mailto:avadhikari123@yahoo.co.in), [avchem@nitk.ac.in](mailto:avchem@nitk.ac.in).

#### Contents

1. ORTEP diagram and crystal data of 3a
2. PXRD data of 5b and 5f

#### 1. ORTEP diagram and crystal data of 3a

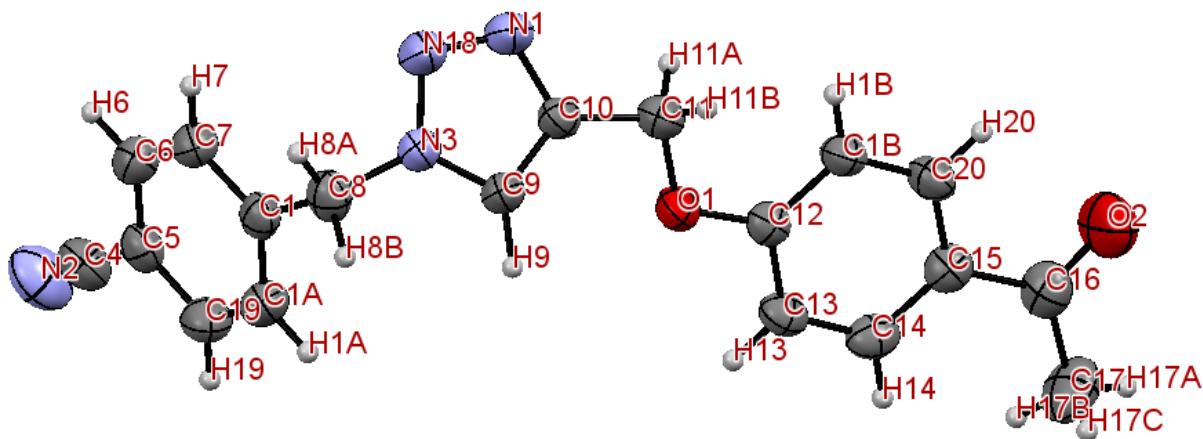

**Figure S1** ORTEP diagram of **3a** with atom numbering. ORTEP diagram is drawn with 50% probability ellipsoids at 296 K.

**Table S1** Crystal data and structure refinement for compound **3a**

| <b>Compound</b>              | <b>3a</b>                                                     |
|------------------------------|---------------------------------------------------------------|
| Formula                      | C <sub>19</sub> H <sub>16</sub> N <sub>4</sub> O <sub>2</sub> |
| Formula weight               | 332.36                                                        |
| CCDC number                  | 966496                                                        |
| Temperature (K)              | 296                                                           |
| Crystal form                 | Block                                                         |
| Color                        | Colorless                                                     |
| Crystal system               | Monoclinic                                                    |
| Space group                  | <i>P 21/c</i>                                                 |
| <i>a</i> (Å)                 | 20.3809(14)                                                   |
| <i>b</i> (Å)                 | 5.5940(4)                                                     |
| <i>c</i> (Å)                 | 15.3584(11)                                                   |
| <i>α</i> (°)                 | 90                                                            |
| <i>β</i> (°)                 | 105.915(4)                                                    |
| <i>γ</i> (°)                 | 90                                                            |
| Volume (Å <sup>3</sup> )     | 1683.91                                                       |
| <i>Z</i>                     | 4                                                             |
| Density (gcm <sup>-3</sup> ) | 1.311                                                         |
| <i>μ</i> (mm <sup>-1</sup> ) | 0.09                                                          |
| F (000)                      | 696.0                                                         |
| <i>h</i> <sub>min, max</sub> | -23,25                                                        |
| <i>k</i> <sub>min, max</sub> | -5,6                                                          |

|                                                |                |
|------------------------------------------------|----------------|
| $I_{\min, \max}$                               | -18,16         |
| Reflections collected                          | 11617          |
| Independent reflections                        | 3240           |
| $R_{\text{all}}, R_{\text{obs}}$               | 0.1022, 0.0526 |
| $wR_{2\text{all}}, wR_{2\text{obs}}$           | 0.1587, 0.1373 |
| $\Delta\rho_{\min, \max}$ (e Å <sup>-3</sup> ) | -0.23, 0.26    |
| GOOF                                           | 0.92           |

## 2. PXRD data of 5b and 5f

**Table S2** X-ray diffraction results of **5b** and **5f** in their hexagonal columnar phase

| Compound  | Phase            | $d_{\text{exp}}/\text{Å}$ | $d_{\text{theo}}/\text{Å}$ | Miller Indices | Lattice Parameters (Å)                                                                                                |
|-----------|------------------|---------------------------|----------------------------|----------------|-----------------------------------------------------------------------------------------------------------------------|
|           |                  |                           |                            | $hk$           | Lattice Area $S$ (Å <sup>2</sup> )<br>Molecular Volume $V$ (Å <sup>3</sup> )                                          |
| <b>5b</b> | Col <sub>h</sub> | 41.61                     | 41.61                      | 10             | a= 48.10 Å                                                                                                            |
|           | at 30 °C         | 4.11                      |                            | halo ( $h$ )   | S= 2675 Å <sup>2</sup><br>$V_{\text{cell}}$ = 10995 Å <sup>3</sup><br>$V_{\text{mol}}$ = 1329 Å <sup>3</sup><br>Z = 8 |
| <b>5f</b> | Col <sub>h</sub> | 37.96                     | 37.96                      | 10             | a= 44 Å                                                                                                               |
|           | at 30 °C         | 4.31                      |                            | halo ( $h$ )   | S= 1666 Å <sup>2</sup><br>$V_{\text{cell}}$ = 7180 Å <sup>3</sup><br>$V_{\text{mol}}$ = 1267 Å <sup>3</sup><br>Z = 6  |

Note: The notations  $d_{\text{exp}}$  and  $d_{\text{theo}}$  are experimental and theoretical diffraction spacings, respectively.  $d_{\text{theo}}$  is deduced from the lattice parameter  $a$  (Col<sub>h</sub>) from the following mathematical expression:  $d_{\text{theo}} = [2/(\sqrt{3}N_{hk})] \cdot [\sum_{hk} d_{hk} \sqrt{(h^2+k^2+hk)}]$ , where  $N_{hk}$  is the number of  $hk$  reflections observed for the Col<sub>h</sub> phase.  $S$  is the lattice area, given by:  $S = (a^2\sqrt{3})/2$  Cell volume,  $V_{\text{cell}} = h.S$

(where  $h$  is the thickness of hexagonal stratum). The molecular volume is defined as  $V_{mol} = M/(\delta \times 0.6022)$ , where  $M$  is molecular weight;  $V_{CH_2}(T) = 26.5616 + 0.02023T$  ( $T$  in °C,  $T_0 = 25^\circ\text{C}$ ); density  $\delta = V_{CH_2}(T_0)/V_{CH_2}(T)$ ; the aggregation number or the number of molecular equivalents per stratum of column  $Z = V_{cell}/V_{mol}$ .  $I$  represents the intensity of reflections (VS: very strong, S: strong, M: medium, VW: very weak, br: broad);  $hk$  are the indexations of the reflections corresponding to the  $\text{Col}_h$  phase.
